# Supplementary material for: Disordered surface formation of WS2via hydrogen plasma with enhanced anode performances for lithium and sodium ion batteries
Source: Royal Society of Chemistry journal article supplement (doi:10.1039/c8se00566d), 2019-01-01
Supplement: c8se00566d1.pdf [file c8se00566d1.pdf]

## Supplementary Information for

### Disordered Surface Formation of WS<sub>2</sub> via Hydrogen Plasma with Enhanced Anode Performances for Lithium and Sodium Ion Batteries

Hongmei Wang <sup>a</sup>, Qian Yuan <sup>a</sup>, Dong Wang<sup>\*a</sup>, Ge Chen<sup>\*b</sup>, Xing Cheng <sup>b</sup>, Thomas Kups <sup>a</sup> and Peter Schaaf <sup>a</sup>

<sup>a</sup> FG Werkstoffe der Elektrotechnik, Institut für Werkstofftechnik und Institut für Mikro- und Nanotechnologien MacroNano®, TU Ilmenau, Gustav-Kirchhoff-Str. 5, 98693 Ilmenau, Germany

<sup>b</sup> Beijing Key Laboratory for Green Catalysis and Separation, College of Environmental & Energy Engineering, Beijing University of Technology, Pingleyuan 100, 100124 Beijing, P. R. China.

\*E-mail: [dong.wang@tu-ilmenau.de](mailto:dong.wang@tu-ilmenau.de) ; [cheng@bjut.edu.cn](mailto:cheng@bjut.edu.cn)

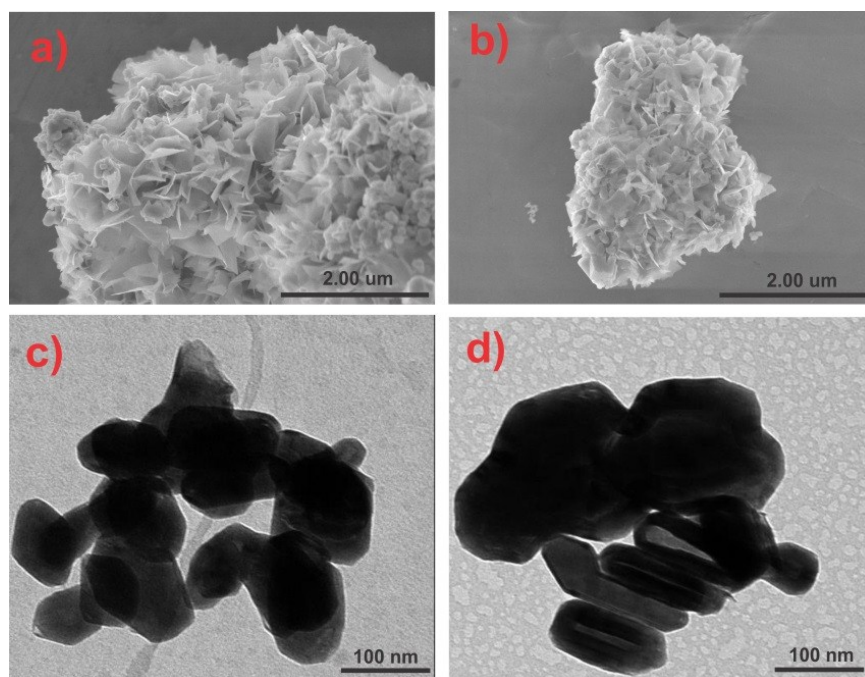

Figure S1. (a) (c) SEM and TEM images of pristine WS<sub>2</sub>; (b)(d) SEM and TEM images of hydrogenated WS<sub>2</sub>.

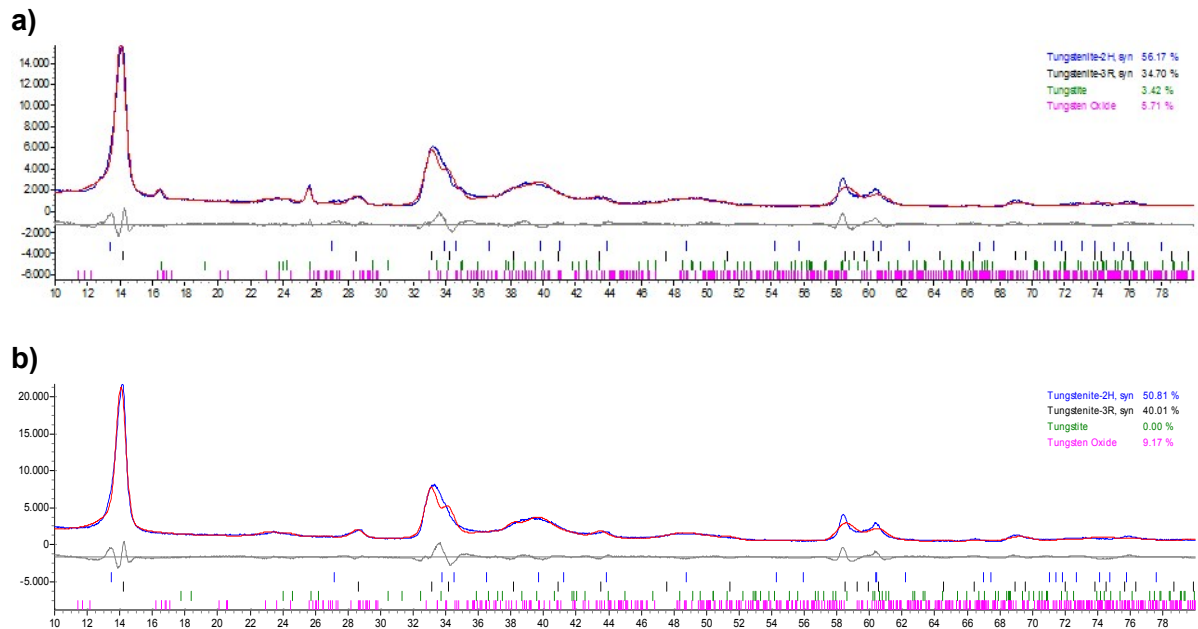

Figure S2. Full pattern quantitative analysis in TOPAS. (a) Pristine  $WS_2$  nanoparticles, (b) hydrogenated  $WS_2$  nanoparticles.

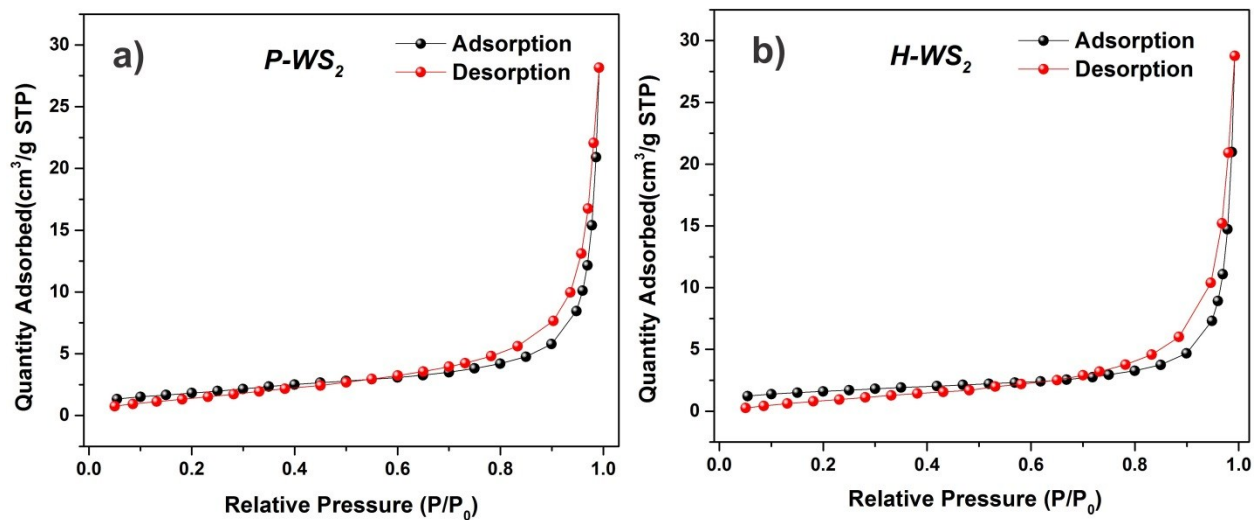

Figure S3. (a)  $N_2$  adsorption/desorption isotherms of pristine  $WS_2$ ; (b)  $N_2$  adsorption/desorption isotherms of  $H-WS_2$ .

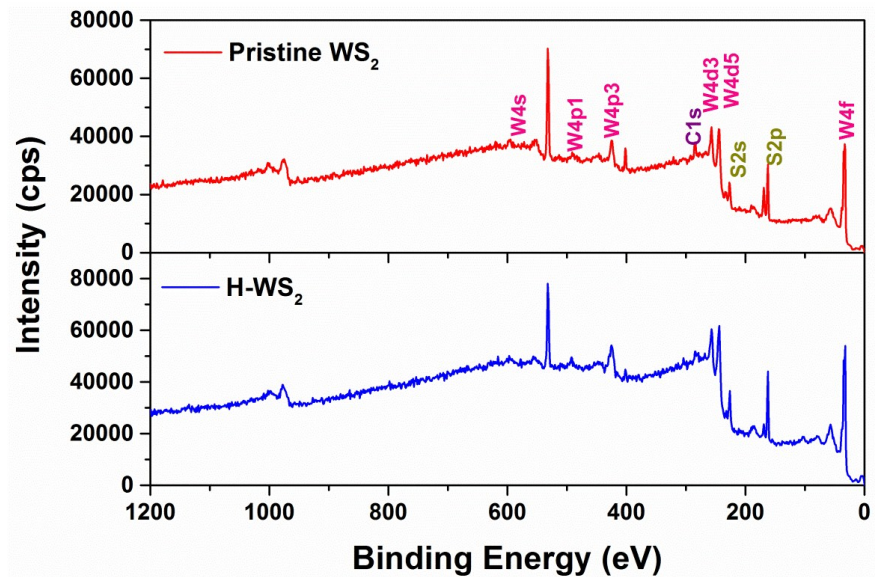

Figure S4. XPS survey spectra of the pristine and hydrogenated  $\text{WS}_2$  nanoparticles.

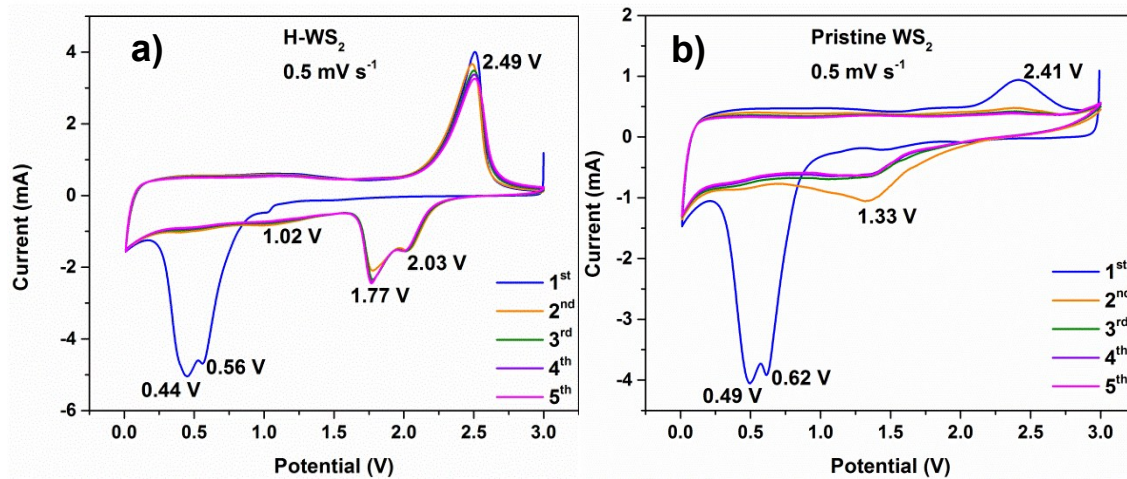

Figure S5. CVs for the (a) H- $\text{WS}_2$  and (b) pristine  $\text{WS}_2$  electrodes measured at a scan rate of  $0.5 \text{ mV s}^{-1}$  for different cycles of lithium ion batteries.

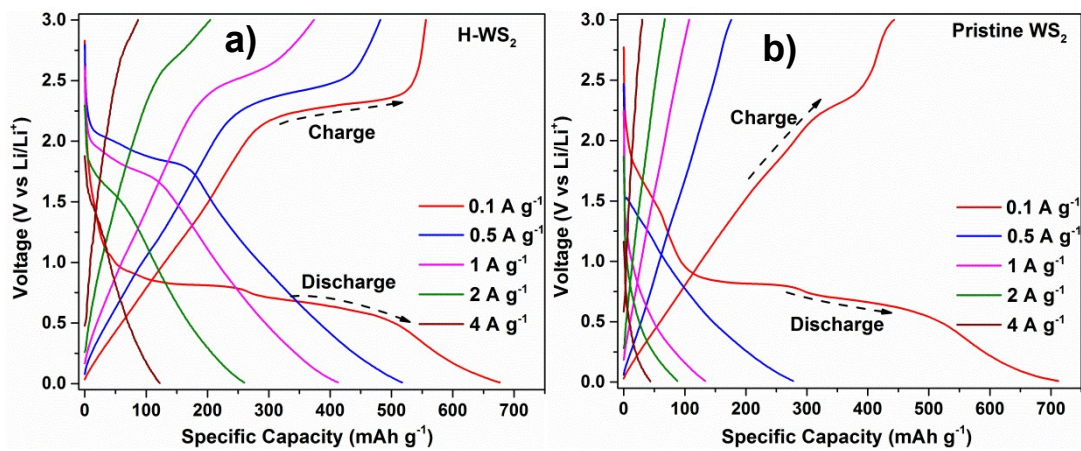

Figure S6 (a) Initial discharge/charge curves of H-WS<sub>2</sub> at different rate in the potential window of 0.01–3.0 V, (b) Initial discharge/charge curves of pristine WS<sub>2</sub> at different rate in the potential window of 0.01–3.0 V of lithium ion batteries.



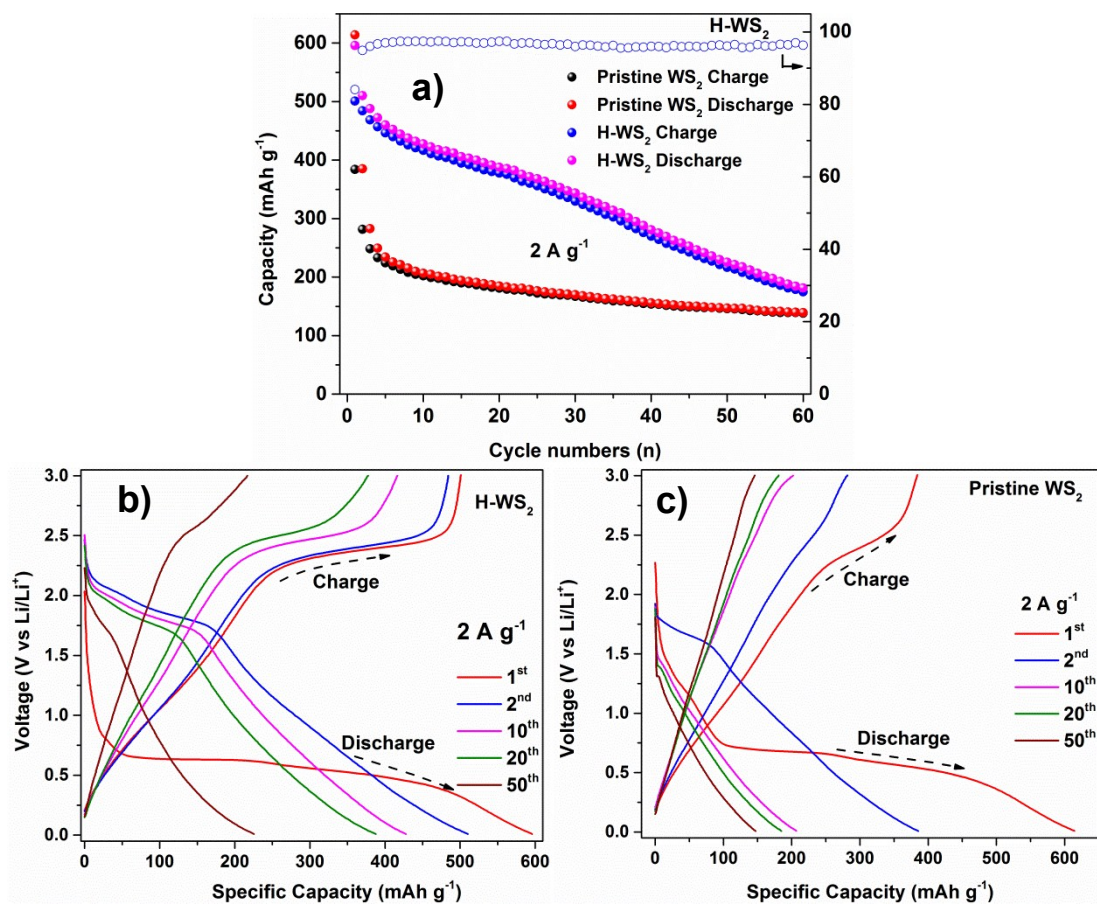

Figure S7. (a) Long term performances and the coulombic efficiencies of samples at charging/discharging rate of 2.0 A·g<sup>-1</sup> for 60 cycles, (b) Initial discharge/charge curves of H-WS<sub>2</sub> at 2.0 A·g<sup>-1</sup> for different cycles in the potential window of 0.01-3.0 V, (c) Initial discharge/charge curves of pristine WS<sub>2</sub> at 2.0 A·g<sup>-1</sup> for different cycles in the potential window of 0.01–3.0 V of lithium ion batteries.

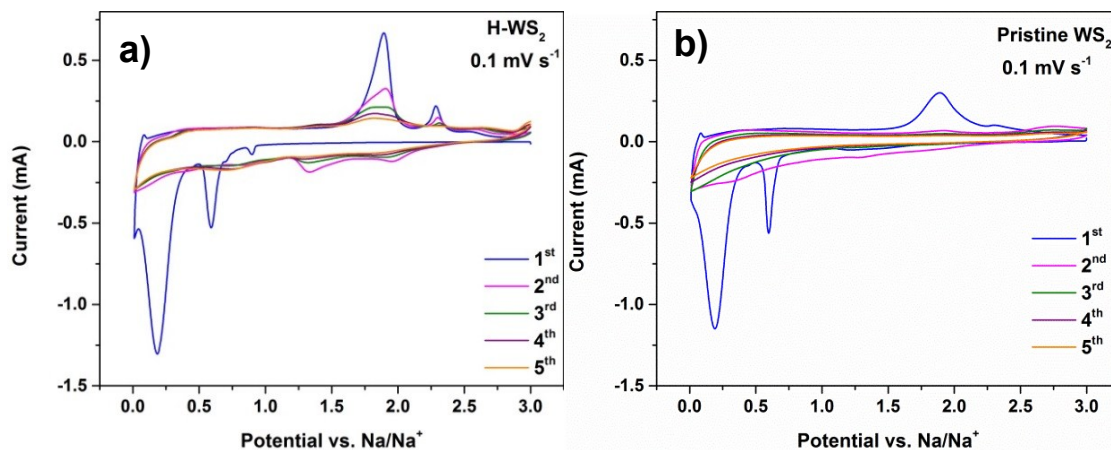

Figure S8. CVs for the (a) H-WS<sub>2</sub> and (b) pristine WS<sub>2</sub> electrodes measured at a scan rate of 0.1 mV·s<sup>-1</sup> for different cycles of sodium ion batteries.

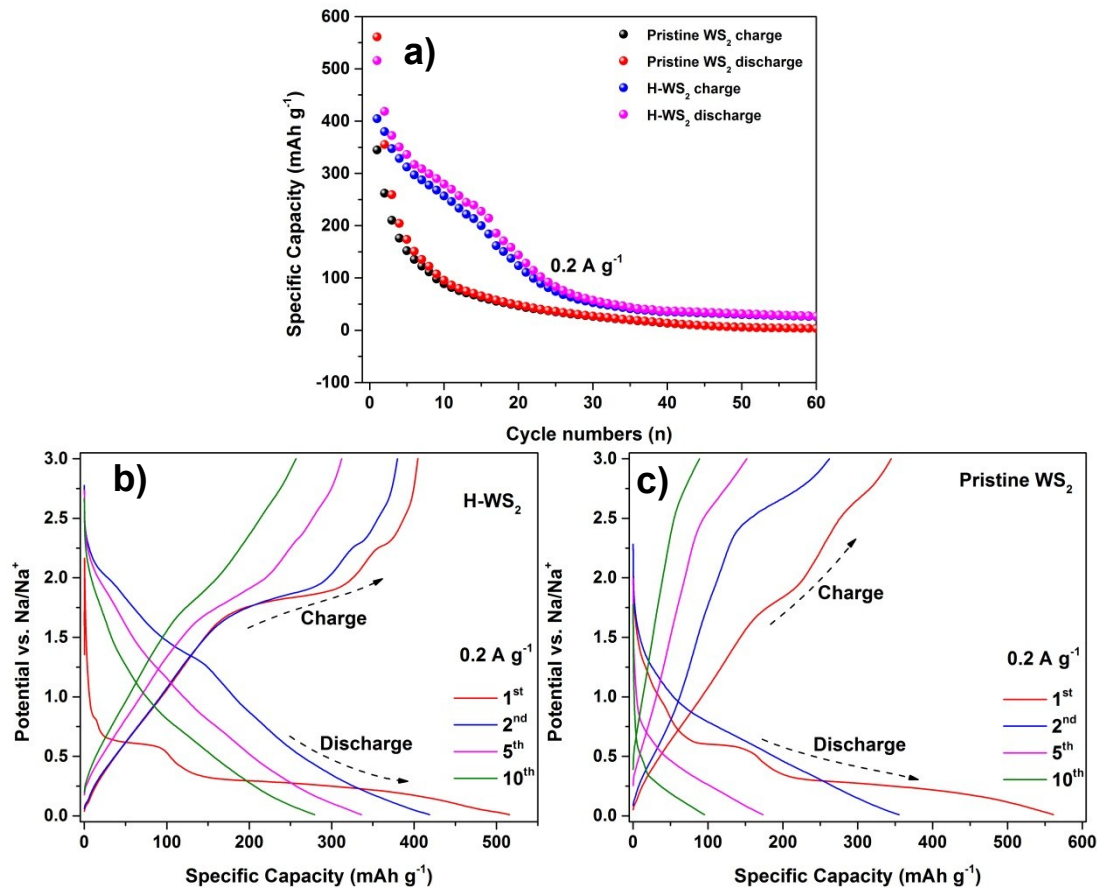

Figure S9. (a) Long term performances of samples at charging/discharging rate of 0.2 A·g<sup>-1</sup> for 60 cycles, (b) Initial discharge/charge curves of H-WS<sub>2</sub> at 0.2 A·g<sup>-1</sup> for different cycles in the potential window of 0.01–3.0 V, (c) Initial discharge/charge curves of pristine WS<sub>2</sub> at 0.2 A·g<sup>-1</sup> for different cycles in the potential window of 0.01–3.0 V of sodium ion batteries.

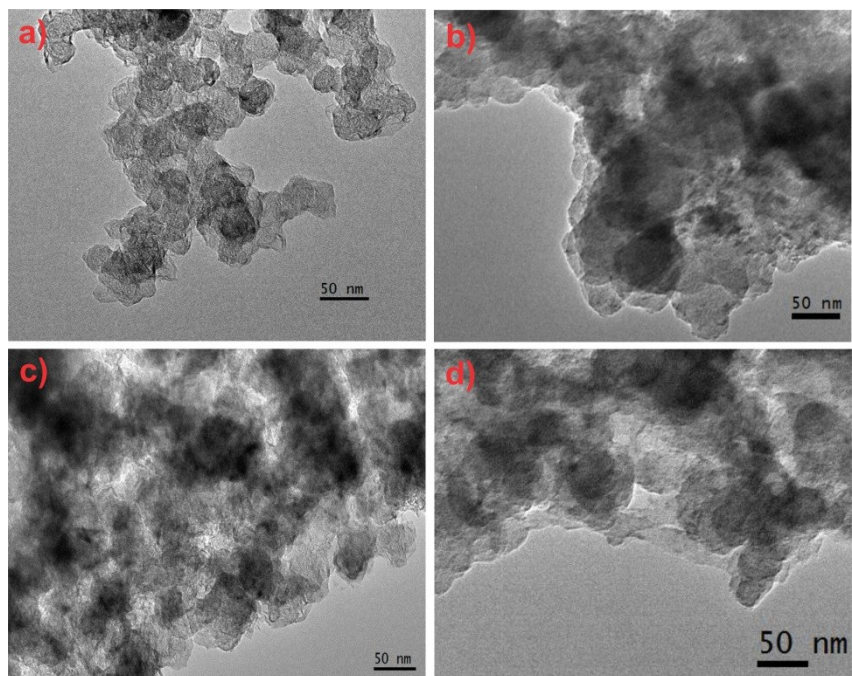

Figure S10. TEM images of (a) pristine WS<sub>2</sub>, (b) H-WS<sub>2</sub> after rate performance testing of lithium ion batteries; TEM images of (c) pristine WS<sub>2</sub>, (d) H-WS<sub>2</sub> after rate performance testing of sodium ion batteries.

Table S1. Phase wt % of pristine and hydrogenated WS<sub>2</sub> nanoparticles.

| Phases                   | Tungstenite 2H | Tungstenite 3R | Tungstite | Triclinic WO <sub>3</sub> |
|--------------------------|----------------|----------------|-----------|---------------------------|
| Pristine WS <sub>2</sub> | 56.17%         | 34.70%         | 3.42%     | 5.71%                     |
| H-WS <sub>2</sub>        | 50.81%         | 40.01%         | 0%        | 9.17%                     |

Table S2. Fitted impedance parameters for the electrodes of (a) LIBs and (b) SIBs.

a) LIBs

| Electrode                | R <sub>S</sub> (Ω) | R <sub>SEI</sub> (Ω) | R <sub>C</sub> (Ω) |
|--------------------------|--------------------|----------------------|--------------------|
| Pristine WS <sub>2</sub> | 2.93               | 132.4                | 313.5              |
| H-WS <sub>2</sub>        | 3.47               | 3.817                | 7.173              |

b) SIBs

| Electrode                | R <sub>S</sub> (Ω) | R <sub>SEI</sub> (Ω) | R <sub>C</sub> (Ω) |
|--------------------------|--------------------|----------------------|--------------------|
| Pristine WS <sub>2</sub> | 7.766              | 433.2                | 1177               |
| H-WS <sub>2</sub>        | 4.933              | 117.6                | 260.5              |



Table S3 Comparison of WS<sub>2</sub> anode material for batteries between current work and related references.

| Active material                               | Discharge capacity (mAh/g) | Current density (mA/g) | Cycle numbers | Battery type | Ref.         |
|-----------------------------------------------|----------------------------|------------------------|---------------|--------------|--------------|
| H-WS <sub>2</sub>                             | 596/515                    | 2000                   | 60            | LIBs / SIBs  | Current work |
| Sulfuration WS <sub>2</sub>                   | ~800                       | 800                    | 50            | LIBs         | 17           |
| Ordered mesoporous WS <sub>2</sub>            | ~700                       | 100                    | 100           | LIBs         | 31           |
| Surface functionalized WS <sub>2</sub> sheets | 465                        | 25                     | 50            | LIBs         | 62           |
| WS <sub>2</sub> nanowires                     | 605.3                      | 100                    | 50            | SIBs         | 70           |
| 3D porous WS <sub>2</sub> /C                  | 267                        | 500                    | 300           | SIBs         | 71           |
| WS <sub>2</sub> -NC                           | 450                        | 1000                   | 100           | SIBs         | 72           |
| WS <sub>2</sub> composite                     | 519                        | 100                    | 100.          | LIBs         | 73           |
| Few-layer WS <sub>2</sub>                     | 45                         | 1000                   | 50            | LIBs         | 74           |
| WS <sub>2</sub> @NGr                          | 455/289                    | 1000                   | 140/60        | LIBs / SIBs  | 75           |
| Graphene-like WS <sub>2</sub> nanosheets      | 550                        | 43.2                   | 70            | LIBs         | 76           |
| WS <sub>2</sub> nanosheets @carbon            | 512/616                    | 200                    | 100/100       | LIBs / SIBs  | 77           |
| Porous WS <sub>2</sub> in CMK-3 matrix        | 720/450                    | 100                    | 100/70        | LIBs / SIBs  | 78           |
